# Supplementary material for: Whole exome sequencing implicates eye development, the unfolded protein response and plasma membrane homeostasis in primary open-angle glaucoma
Source: PLOS journal article supplement (doi:10.1371/journal.pone.0172427), 2017-03-06
Supplement: S1 (10.1371/journal.pone.0172427.s001) [file journal.pone.0172427.s001]

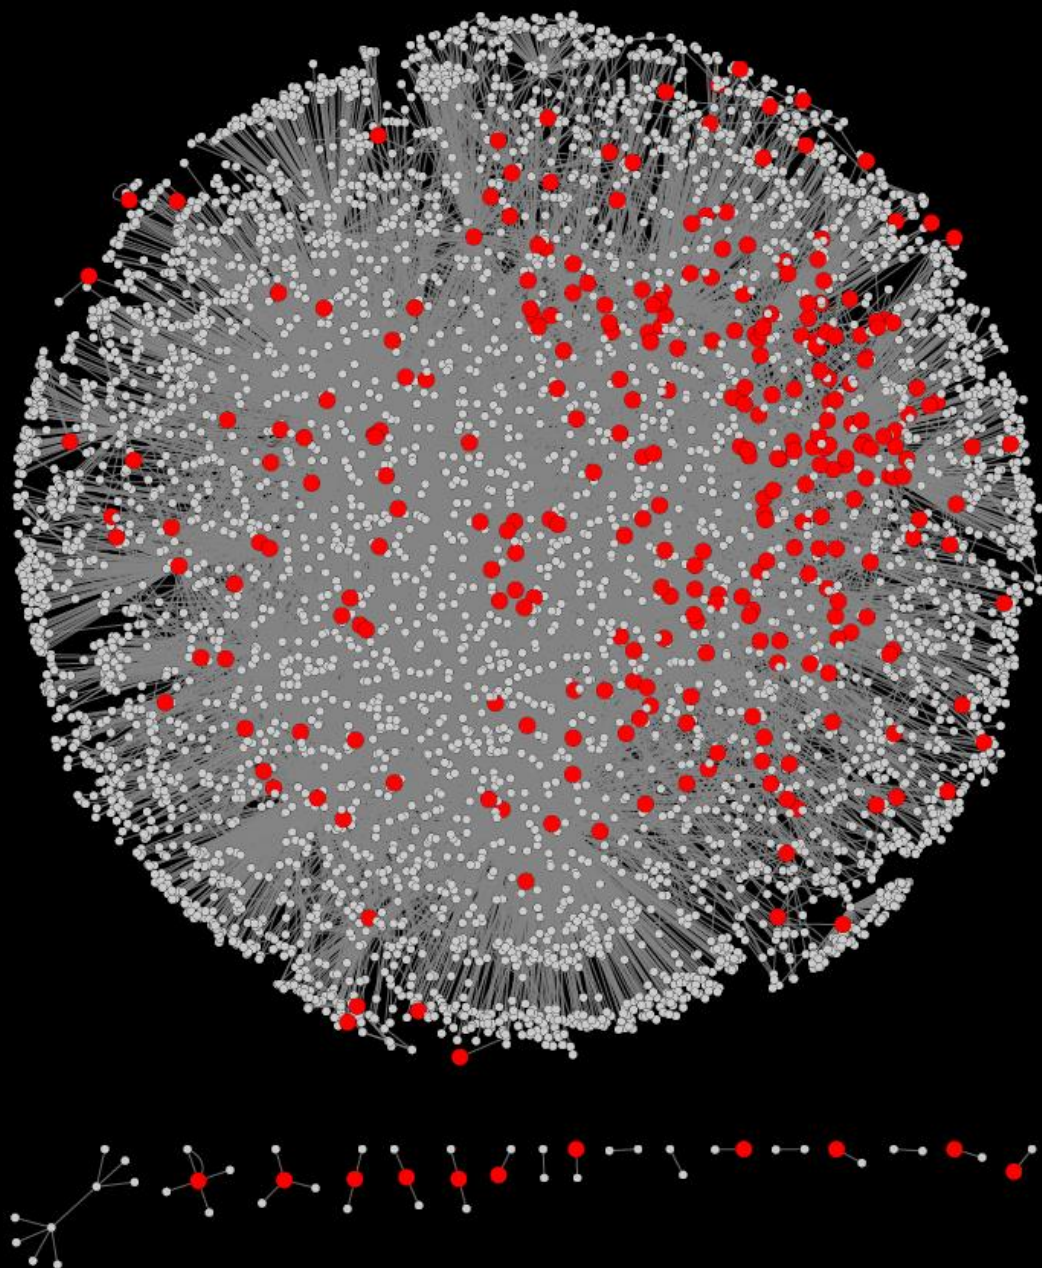

S1 Fig: Network of all high-tension glaucoma enriched genes showing interaction between the enriched genes and their first neighbor interactors
