# Supplementary material for: Whole exome sequencing implicates eye development, the unfolded protein response and plasma membrane homeostasis in primary open-angle glaucoma
Source: PLOS journal article supplement (doi:10.1371/journal.pone.0172427), 2017-03-06
Supplement: S2 (10.1371/journal.pone.0172427.s002) [file journal.pone.0172427.s002]

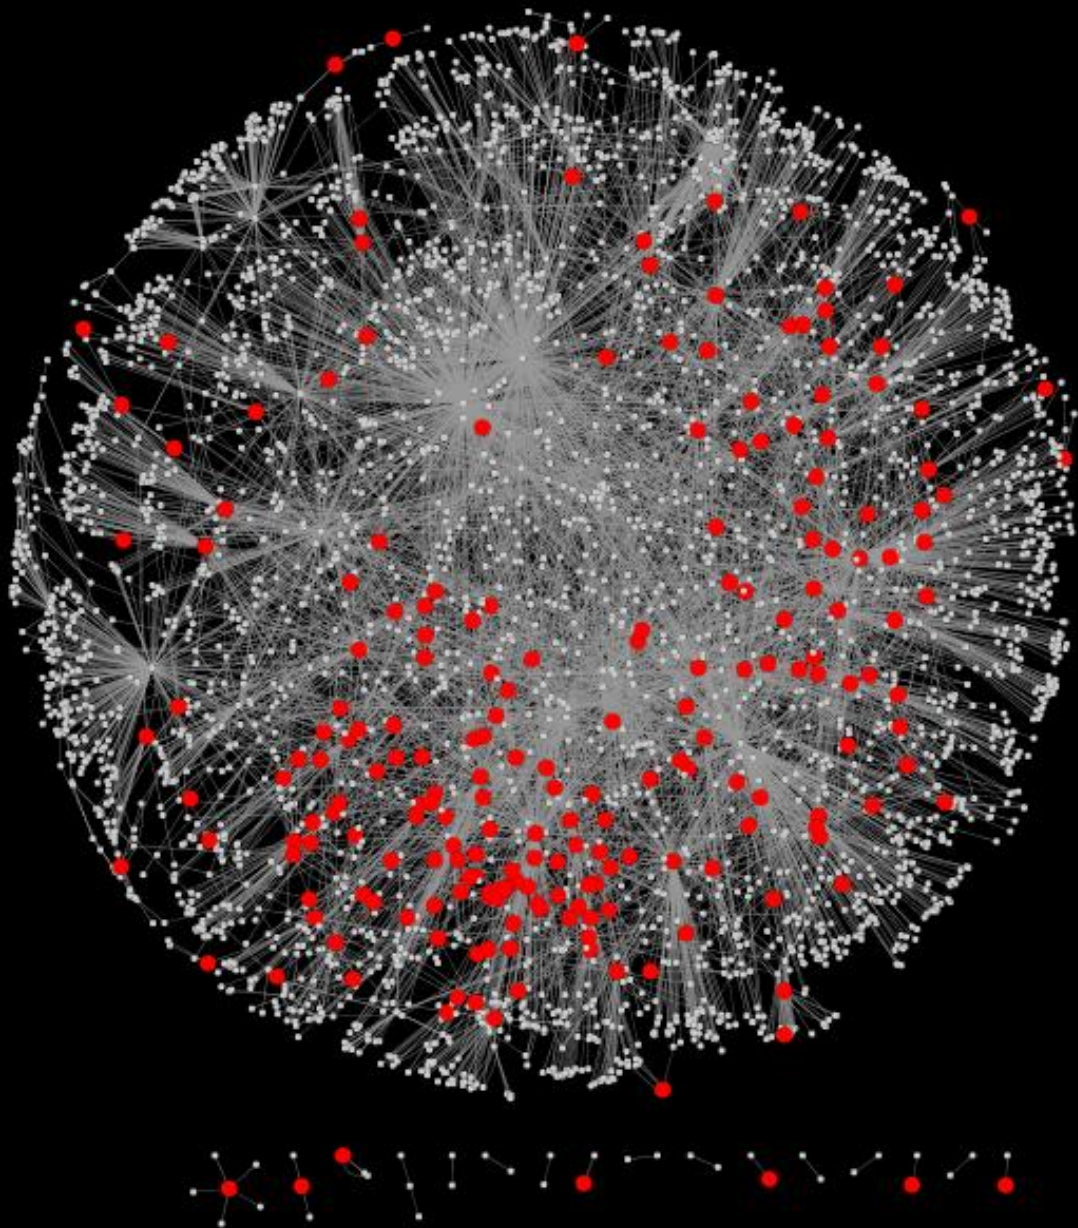

S2 Fig: Network of all normal-tension glaucoma enriched genes showing interaction between the enriched genes and their first neighbor interactors
